# Supplementary material for: Recent progress on elucidating the molecular mechanism of plasmid-mediated colistin resistance and drug design
Source: PubMed Central journal article supplement (PMC7347692; doi:10.1007/s10123-019-00112-1), 2019-12-23
Supplement: 10123_2019_112_MOESM1_ESM.pdf [file 10123_2019_112_MOESM1_ESM.pdf]

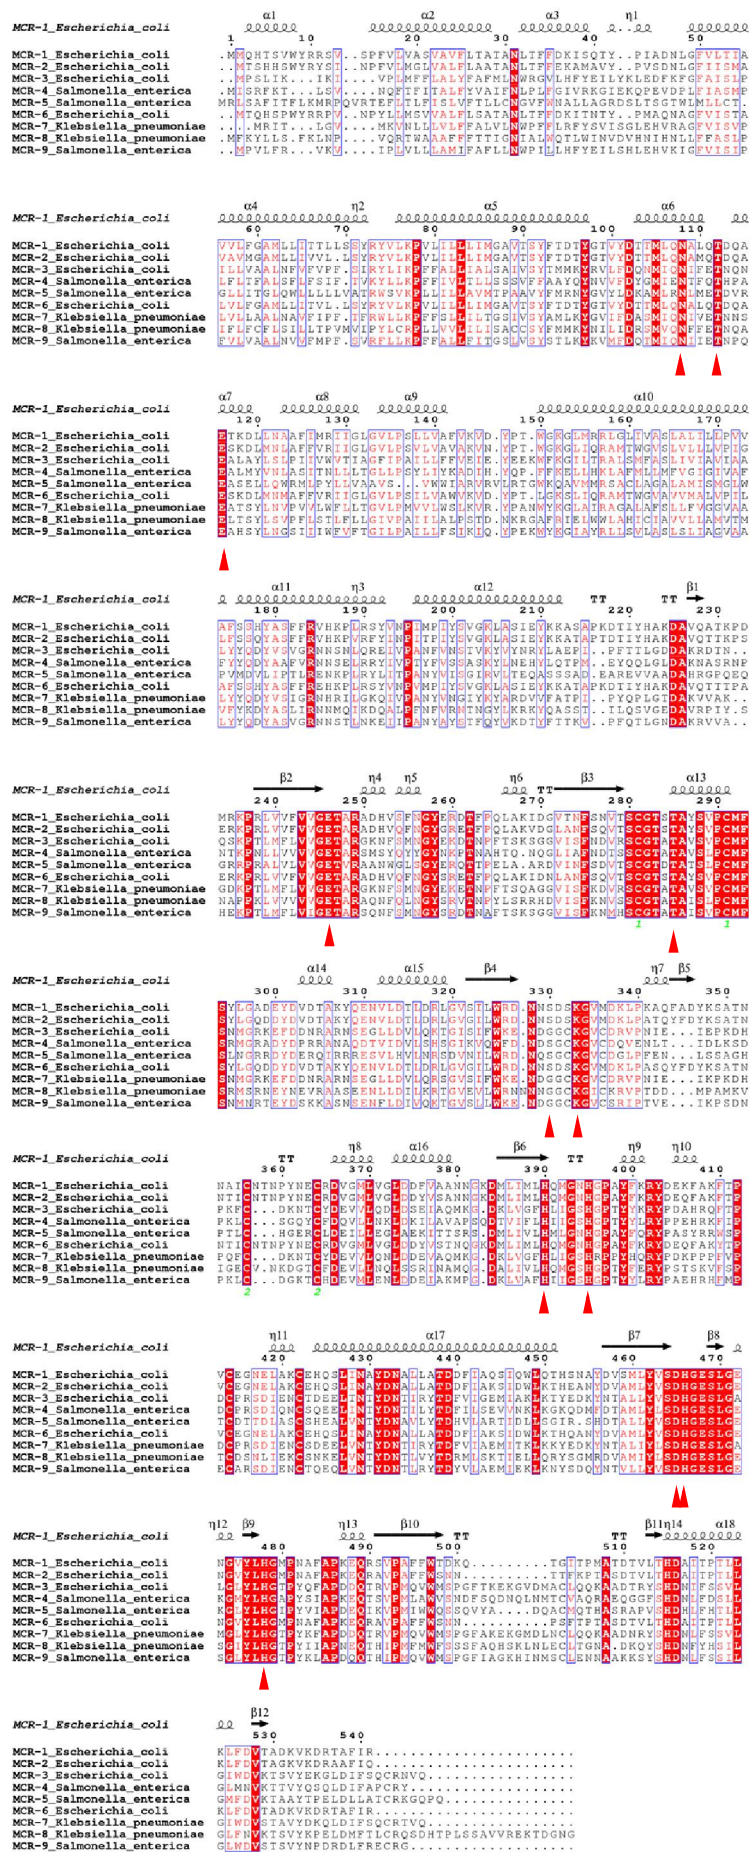

**Supplementary Figure 1. Multiple sequence alignment of full-length MCR-1 and its variants. The important residues for catalyze reaction are highlighted by red triangles.**
